# Supplementary material
Source: PubMed Central journal article supplement (PMC11027826)
Supplement: 262_2019_2475_MOESM1_ESM.pdf [file 262_2019_2475_MOESM1_ESM.pdf]

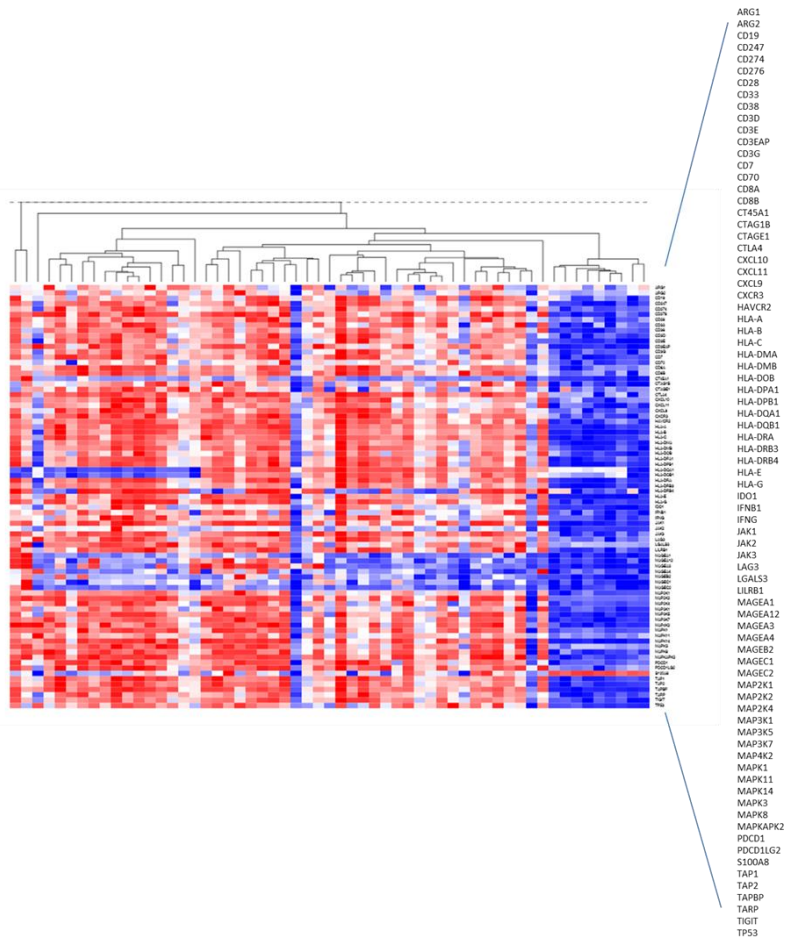

Sup Fig1: Heatmap showing differential expression of immune profile- and immune escape related genes. Levels of downregulated expression (blue) or upregulated expression (red) are shown on a log<sub>2</sub> scale from low to high expression of each gene.

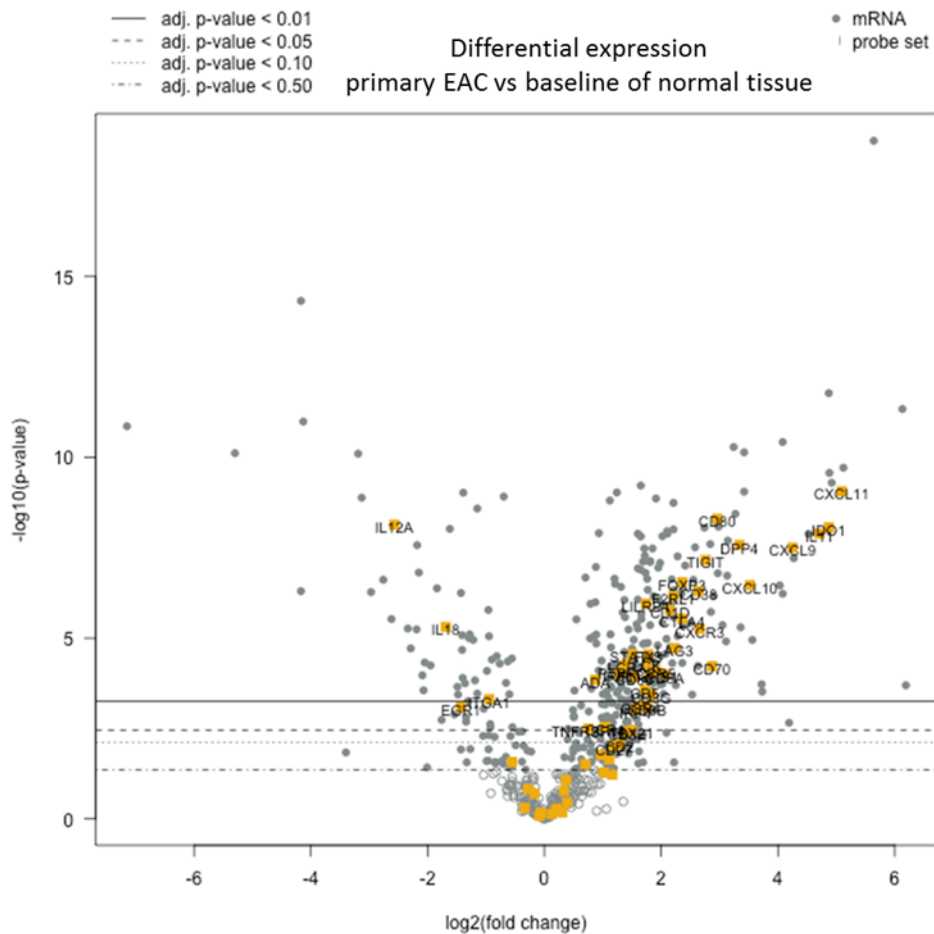

Sup Fig2: Differential expression of genes associated with T cell function. Expression of immune-related genes in primary EAC. Fold change expression is shown as log<sub>2</sub> values. Level of significance (p-value) is represented as -log<sub>10</sub> on the y-axis, thresholds of significant are represented by different line, as indicated on top. Yellow dots indicate genes related to T cell function.

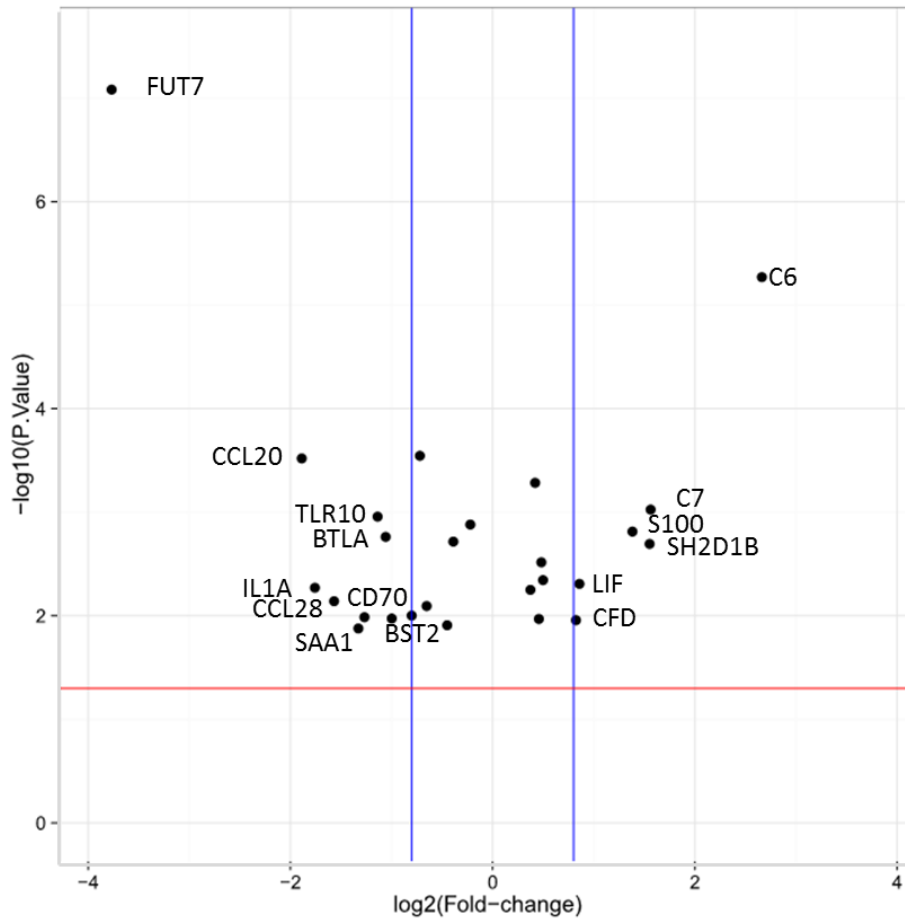

Sup Fig3: TOP 25 genes of post NACT versus naive EAC. Volcano plot for log2 foldchanges in mRNA gene expression levels in post NACT vs primary resected treatment- naive EAC. Thresholds of significance p-value:1.3 ; log2FC: 0.8

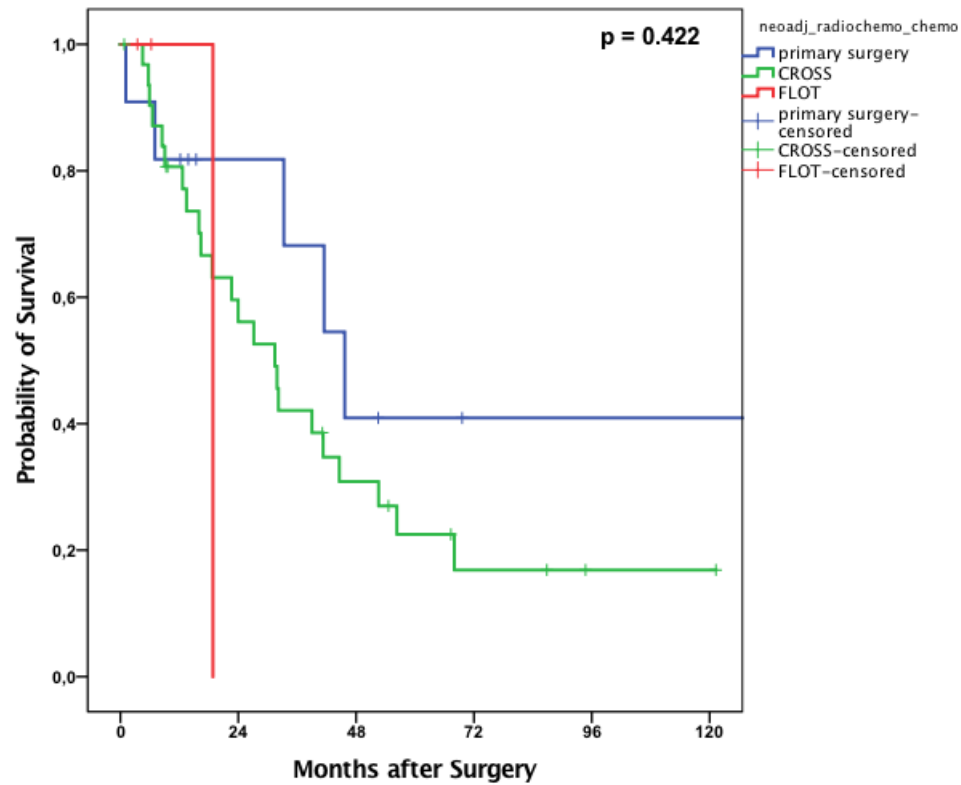

Sup Fig4: Patients survival data depicted in a Kaplan-Meier graph for primary resected (blue) and NACT-treated patients (green: CROSS, red: FLOT)
